# Supplementary material
Source: PubMed Central journal article supplement (PMC6047071)
Supplement: NIHMS975515-supplement-Supporting_Information.pdf [file NIHMS975515-supplement-Supporting_Information.pdf]

### *Overexpression and purification of T7 RNA Polymerase (T7RNAP) wild-type*

The purification of T7RNAP wild-type (WT) exploited immobilized metal affinity-chromatography and was performed essentially as described earlier,<sup>[1]</sup> albeit with minor changes as outlined below. *Escherichia coli* BL21(DE3) cells were transformed with two plasmids: pQE9T7 (amp<sup>r</sup>) and pREP4 (kan<sup>r</sup>) which encode (His)<sub>6</sub>-T7RNAP WT and *lac* repressor, respectively, and grown on a lysogeny broth (LB) agar plate containing 100 µg/mL carbenicillin and 35 µg/mL kanamycin at 37°C for 16 h. A single colony was picked to inoculate 5 mL of LB containing 100 µg/mL carbenicillin and 35 µg/mL kanamycin, and grown at 37°C for 16 h with shaking at 200 rpm. The 5-mL culture was then used to inoculate 500 mL of LB containing 100 µg/mL carbenicillin and 35 µg/mL of kanamycin, and grown at 37°C with shaking at 200 rpm until OD<sub>600</sub> ~0.6. The culture was induced by addition of isopropyl-β-D-thiogalactoside (IPTG) to a final concentration 1 mM, and then grown at 37°C for an additional 2.5 h. Cells were harvested by centrifugation at 6,000 g for 20 min, and the pellets stored at -80°C until further use.

A 500-mL cell pellet was thawed on ice and then resuspended in buffer A [100 mM sodium phosphate (pH 7.7), 300 mM NaCl, 0.5 mM DTT, 1 mM PMSF, 2 mini EDTA-free protease inhibitor tablets (Roche)]. Cells were lysed by sonication (60% amplitude, 12-min of alternating cycles of 4 s ON and 10 s OFF; Cole Parmer 130-Watt Ultrasonic Processor model GEX130) and the crude lysate was subjected to centrifugation at 20,000 g for 1 h at 4°C. The supernatant obtained was filtered through a 0.45 µm syringe filter. After addition of 20 mM imidazole to the filtered supernatant, it was loaded onto a pre-equilibrated 5-mL HisTrap HP (GE Healthcare) column. An ATKA FPLC (GE Healthcare) was used for the subsequent elution. The column was washed with 50 mL buffer B [100 mM sodium phosphate (pH 7.7), 300 mM NaCl, 0.5 mM DTT, 1 mM PMSF, 20 mM imidazole], and T7RNAP WT was eluted using a 100-ml linear gradient from 20-300 mM imidazole at a flow rate of 3 mL/min. T7RNAP WT typically eluted between 170-210 mM imidazole. Peak fractions, as judged by SDS-PAGE analysis, were pooled and subsequently dialyzed against 500 mL of buffer C [50 mM sodium phosphate (pH 7.7), 100 mM NaCl, 1 mM DTT, 0.1 mM PMSF, 1 mM EDTA and 50% (v/v) glycerol] at 4°C overnight after one buffer exchange after 2 h. Aliquots of the purified T7RNAP (dialysate) were stored at -80°C until further use in in vitro transcriptions (IVTs).

### *Overexpression and purification of T7RNAP P266L*

The overexpression and purification of (His)<sub>6</sub>-T7RNAP P266L was based on a protocol kindly provided by the laboratory of Prof. Thomas A. Steitz, Yale University,<sup>[2]</sup> with some notable modifications (exclusion of a polishing step as well as dialysis and final preparative steps). *E. coli* BL21(DE3) cells were transformed with pBH161 (a gift from the Steitz laboratory), which encodes (His)<sub>6</sub>-T7RNAP P266L, and grown on an LB-agar plate containing 50 µg/mL carbenicillin at 37°C for 16 h. A single colony was picked to inoculate 5 mL of Terrific Broth (TB) containing 50 µg/mL carbenicillin and the culture was grown at 37°C for 16 h with shaking at 200 rpm. This 5-mL seed culture was added to 500 mL of TB containing 50 µg/mL carbenicillin and grown at 37°C with shaking at 200 rpm until OD<sub>600</sub> ~1. Next, carbenicillin was supplemented to a final concentration of 100 µg/mL and the culture induced with 1 mM IPTG at 37°C for 4 h. Cells were harvested (as described above for WT) and the pellets stored at -80°C.

For purification of T7RNAP P266L, a 500-mL cell pellet was thawed on ice and then resuspended in buffer D [10 mM Tris-HCl (pH 8.0), 375 mM NaCl, 0.5 mM DTT, 1 mM PMSF, 2 mini EDTA-free protease inhibitor tablets (Roche)]. Subsequent steps mirrored the T7RNAP WT procedure described above with the exception of use of a 1-mL HisTrap (GE Healthcare) column. After washing with 10 mL of buffer E [10 mM Tris-HCl (pH 8.0), 375 mM NaCl, 0.5 mM DTT, 1 mM PMSF, 20 mM imidazole], T7RNAP P266L was eluted using a 12-ml linear gradient from 20-200 mM imidazole. T7RNAP P266L typically eluted between 140-180 mM imidazole. Peak fractions, as assessed by SDS-PAGE analysis, were pooled and subsequently dialyzed in 500 mL of buffer F [100 mM sodium phosphate (pH 7.7), 200 mM NaCl, 2 mM DTT, 0.2 mM PMSF, 2 mM EDTA] at 4°C for 3 h with buffer exchanges every hour. An equal volume of glycerol was added to the dialysate and the solution was mixed at 4°C using a nutator. Aliquots of the purified T7RNAP P266L [in 50% (v/v) glycerol] were stored at -80°C until further use.

## References

- [1] T. Ellinger, R. Ehricht, *BioTechniques* **1998**, 24, 718-720.
- [2] K. J. Durniak, S. Bailey, T. A. Steitz, *Science* **2008**, 322, 553-557.

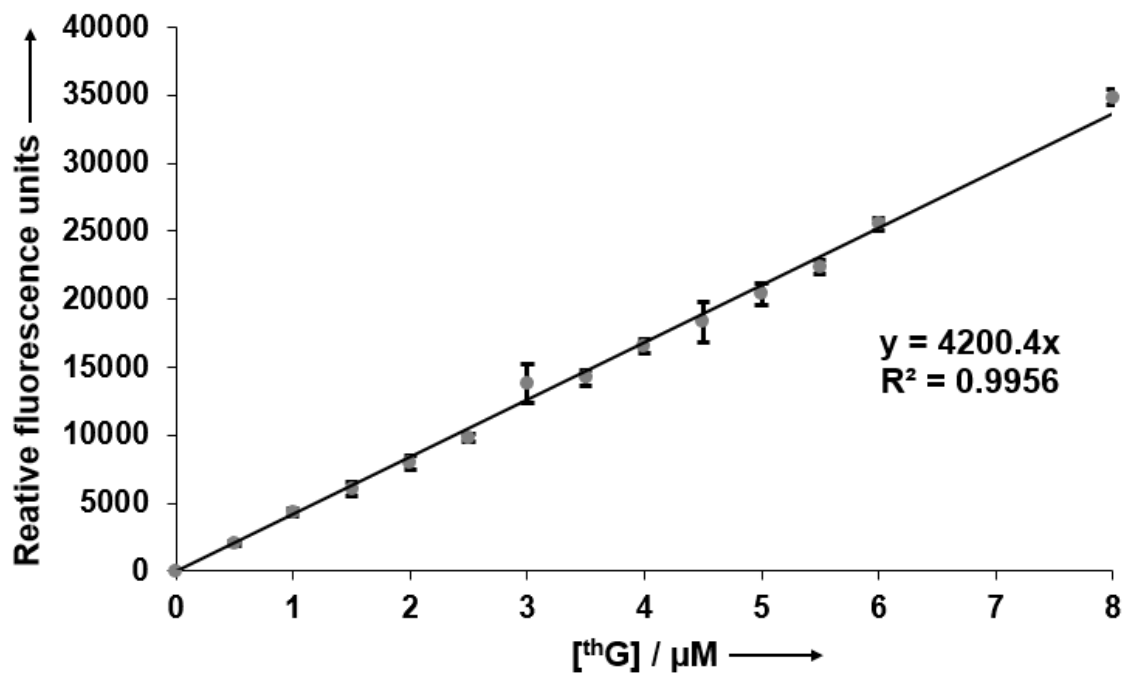

**Supplementary Figure S1.** Standard curve used to determine percent incorporation of <sup>th</sup>G into pre-tRNA<sup>Cys</sup>. Mean and standard deviation values were calculated from three independent measurements.

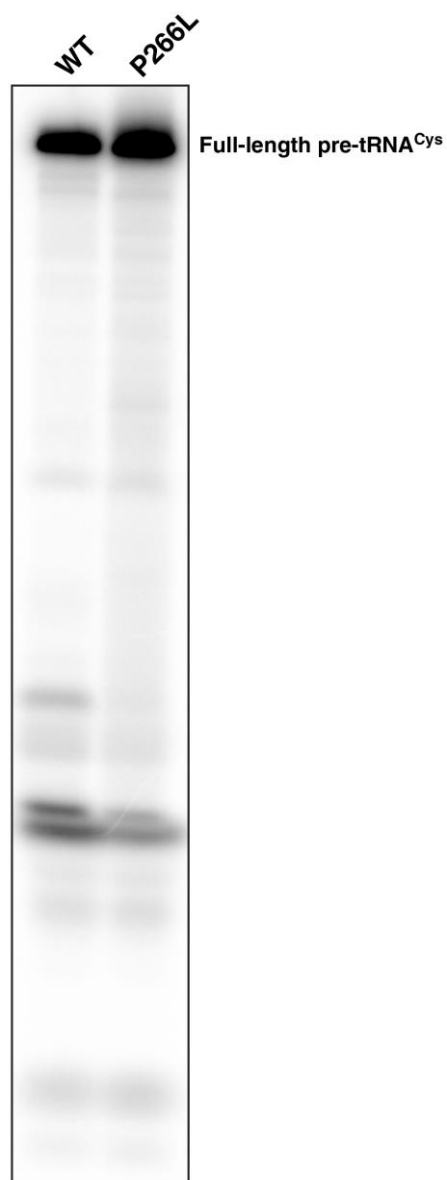

**Supplementary Figure S2.** T7 RNAP P266L yields fewer aborted transcripts than WT when IVTs are performed with <sup>th</sup>G. IVTs to generate pre-tRNA<sup>Cys</sup> were performed using either T7 RNAP WT or P266L as described in the main text, except each reaction also contained 10  $\mu$ Ci of  $\alpha$ -<sup>32</sup>P-GTP (Perkin Elmer, Shelton, CT). Transcription was terminated by addition of a loading dye containing 7 M urea and 20% (v/v) phenol. One-tenth of the 20  $\mu$ L IVT reaction was loaded on a 7% (w/v) polyacrylamide/7 M urea gel (40 cm length x 20 cm width), and electrophoresed for 75 min at 30 mA. The gel was then exposed for 2 h to a phosphorimager screen, and IVT products were visualized using an Amersham Typhoon 5 Biomolecular Imager (GE Healthcare). Based on quantitation performed using ImageQuant 5.1 software, there is a 1.3-fold increase in the full-length pre-tRNA<sup>Cys</sup> and a corresponding decrease in aborted transcripts.

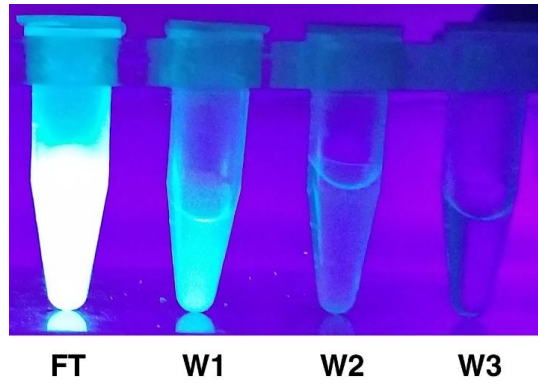

**Supplementary Figure S3.** Efficacy of the Zymo Clean and Concentrator™-25 approach to remove unincorporated <sup>3</sup>H-G. Tubes were illuminated at 312 nm using a Fotodyne UV transilluminator to visualize the removal of free <sup>3</sup>H-G. FT: flow-through; W1: wash using the RNA prep buffer (400 µl); and W2: wash using the RNA wash buffer (700 µl). W3: wash using the RNA wash buffer (400 µl). Short RNAs <18 nt are expected to be removed by this desalting approach using the recommended volumes (according to the manufacturer).

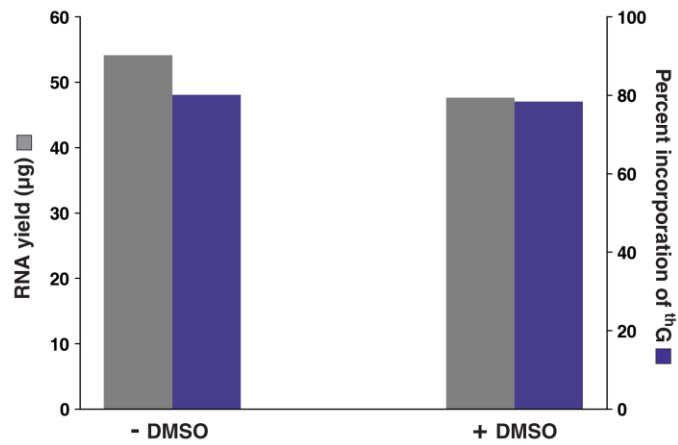

**Supplementary Figure S4.** RNA yield and percent incorporation of <sup>th</sup>G into pre-tRNA<sup>Cys</sup> using T7RNAP P266L in the absence or presence of 5% (v/v) DMSO. The data reported here are from a single IVT trial.
